# Supplementary material for: Transcriptome and Proteome Dynamics of a Light-Dark Synchronized Bacterial Cell Cycle
Source: PLOS journal article supplement (doi:10.1371/journal.pone.0043432), 2012-08-29
Supplement: S12 (10.1371/journal.pone.0043432.s012) [file journal.pone.0043432.s012]

|                               | Number of<br>Timecourses | <i>q</i> -value<br>Cutoff | Number of<br>Significantly Cycling<br>Timecourses<br>( <i>q</i> <Cutoff) | $\pi_0$ | False<br>Positives<br>(FP) | True<br>Negatives<br>(TN) | True<br>Positives<br>(TP) | False<br>Negatives<br>(FN) | Fraction of<br>Genes that<br>are Cycling | Sensitivity | Specificity |
|-------------------------------|--------------------------|---------------------------|--------------------------------------------------------------------------|---------|----------------------------|---------------------------|---------------------------|----------------------------|------------------------------------------|-------------|-------------|
| <b>Transcriptome (RNAseq)</b> | 1685                     | 0.040                     | 1279                                                                     | 0.131   | 4%                         | 9%                        | 73%                       | 14%                        | 87%                                      | 84%         | 69%         |
| <b>Proteome</b>               | 548                      | 0.130                     | 312                                                                      | 0.287   | 13%                        | 16%                       | 50%                       | 22%                        | 71%                                      | 70%         | 55%         |
| <b>Microarrays</b>            | 1907                     | 0.061                     | 1241                                                                     | 0.170   | 6%                         | 11%                       | 61%                       | 22%                        | 83%                                      | 74%         | 64%         |

**Note:** Based on the distributions of *q*-values, a cutoff was chosen for each dataset (Supporting Figure S4), defining the number of significantly cycling timecourses. QVALUE also calculates the parameter  $\pi_0$ , which estimates the total proportion of negatives (i.e., non-cycling genes) in the dataset; the fraction of cycling genes is thus  $1-\pi_0$ . The proportion of false positives (FP) is equal to the *q*-value cutoff, and true negatives are given by  $TN = \pi_0 - FP$ . True positives are given by  $TP = (n_{\text{Significant}}/n_{\text{Timecourses}})(1 - FP)$ , and the remainder are false negatives (FN). Two performance metrics for the detection of cycling in the two datasets are also shown: sensitivity ( $= TP/(TP + FN)$ ) and specificity ( $= TN/(TN + FP)$ ).
