# Supplementary material for: Transcriptome and Proteome Dynamics of a Light-Dark Synchronized Bacterial Cell Cycle
Source: PLOS journal article supplement (doi:10.1371/journal.pone.0043432), 2012-08-29
Supplement: S16 (10.1371/journal.pone.0043432.s016) [file journal.pone.0043432.s016]

| <b>Filtering Step</b> | <b>Unique LC-MS <sup>14</sup>N/<sup>15</sup>N peakgroup pairs</b> | <b>Protein timepoints</b> | <b>Detected &amp; quantified proteins</b> | <b>Proteins detected at all 14 timepoints</b> |
|-----------------------|-------------------------------------------------------------------|---------------------------|-------------------------------------------|-----------------------------------------------|
| Full diel dataset     | 95,542                                                            | 8,812                     | 1,021                                     | 360                                           |
| Peak CV               | 76,434                                                            | 8,181                     | 967                                       | 307                                           |
| Peaks per timepoint   | 73,185                                                            | 6,157                     | 548                                       | 170                                           |
| IIR peak outliers     | 66,661                                                            | 6,157                     | 548                                       | 170                                           |
| Timepoint outliers    | 66,186                                                            | 6,087                     | 548                                       | 154                                           |
